# Supplementary material for: Assignment of O–O and Mo=O Stretching Frequencies of Molybdenum/Tungsten Complexes Revisited
Source: Hindawi journal article supplement (doi:10.1155/2015/439270), 2015-01-01
Supplement: f1 [file 439270.f1.pdf]

## Contents

|                                                         |    |
|---------------------------------------------------------|----|
| Cartesian coordinate of reported complexes.....         | 4  |
| Table 1 and Figure 1.....                               | 4  |
| 1-C1 at M06/def2-TZVP.....                              | 4  |
| 1-C2 at M06/def2-TZVP.....                              | 4  |
| Table 2.....                                            | 5  |
| 1-C2 at M06/SVP .....                                   | 5  |
| 1-C2 at M06/SVPD .....                                  | 5  |
| 1-C2 at M06/TZVPD .....                                 | 6  |
| Table 3.....                                            | 6  |
| 1-C2 at M06/Mo:LANL2TZ(f) and Non-Mo:6-311+G(d,p) ..... | 6  |
| 1-C2 at M06/Mo:LANL2TZ(f) and Non-Mo:ACCT .....         | 6  |
| 1-C2 at M06/Mo:LANL2DZmod and Non-Mo:6-311+G(d,p).....  | 7  |
| 1-C2 at M06/Mo:LANL2DZmod and Non-Mo:ACCT .....         | 7  |
| Table 4.....                                            | 8  |
| 1-C2 at M06L/def2-TZVP .....                            | 8  |
| 1-C2 at M06-2X/def2-TZVP.....                           | 8  |
| 1-C2 at PBE0/def2-TZVP.....                             | 9  |
| 1-C2 at B3LYP/def2-TZVP.....                            | 9  |
| 1-C2 at B3PW91/def2-TZVP.....                           | 9  |
| 1-C2 at MP2/def2-SVP.....                               | 10 |
| 1-C2 at MP2/def2-SVPD .....                             | 10 |
| 1-C2 at MP2/def2-TZVP.....                              | 11 |
| Table 5.....                                            | 11 |
| 1-CF <sub>3</sub> at M06L/def2-TZVP .....               | 11 |
| 1-CF <sub>3</sub> at M06-2X/def2-TZVP.....              | 12 |
| 1-CF <sub>3</sub> at M06-2X/def2-TZVP .....             | 12 |
| Table 6.....                                            | 13 |
| 1-Cl at M06L/def2-TZVP .....                            | 13 |
| 1-Cl at M06/def2-TZVP.....                              | 13 |

|                                                         |    |
|---------------------------------------------------------|----|
| 1-Cl at M06-2X/def2-TZVP.....                           | 13 |
| Table 7.....                                            | 14 |
| 2 at M06L/def2-TZVP.....                                | 14 |
| 2 at M06/def2-TZVP.....                                 | 14 |
| 2 at M06-2X/def2-TZVP.....                              | 15 |
| 2 at PBE0/def2-TZVP.....                                | 15 |
| 2 at B3LYP/def2-TZVP.....                               | 15 |
| 2 at cam-B3LYP/def2-TZVP.....                           | 16 |
| 2 at B3PW91/def2-TZVP.....                              | 16 |
| 2 at wB97xD/def2-TZVP.....                              | 17 |
| 2 at MP2/def2-SVP.....                                  | 17 |
| 2 at MP2/def2-SVPD.....                                 | 17 |
| 2 at MP2/def2-TZVP.....                                 | 18 |
| Table 8.....                                            | 18 |
| MoO <sub>4</sub> <sup>2-</sup> at MP2/def2-SVP.....     | 18 |
| MoO <sub>4</sub> <sup>2-</sup> at MP2/def2-SVPD.....    | 18 |
| MoO <sub>4</sub> <sup>2-</sup> at MP2/def2-TZVP.....    | 19 |
| MoO <sub>4</sub> <sup>2-</sup> at MP2/def2-TZVPD.....   | 19 |
| MoO <sub>4</sub> <sup>2-</sup> at MP2/def2-QZVPD.....   | 19 |
| MoO <sub>4</sub> <sup>2-</sup> at CCSD(T)/def2-SVP..... | 19 |
| MoO <sub>4</sub> <sup>2-</sup> at M06L/def2-SVP.....    | 19 |
| MoO <sub>4</sub> <sup>2-</sup> at M06L/def2-SVPD.....   | 20 |
| MoO <sub>4</sub> <sup>2-</sup> at M06L/def2-TZVP.....   | 20 |
| MoO <sub>4</sub> <sup>2-</sup> at M06L/def2-TZVPD.....  | 20 |
| Table 9.....                                            | 20 |
| 3 at M06L/def2-TZVP.....                                | 20 |
| 4 at M06L/def2-TZVP.....                                | 20 |
| 5 at M06L/def2-TZVP.....                                | 21 |
| 6 at M06L/def2-TZVP.....                                | 22 |
| 7 at M06L/def2-TZVP.....                                | 22 |
| 8 at M06L/def2-TZVP.....                                | 23 |

|                                                                                                              |    |
|--------------------------------------------------------------------------------------------------------------|----|
| 9 at M06L/def2-TZVP .....                                                                                    | 24 |
| 10 at M06L/def2-TZVP .....                                                                                   | 25 |
| Table 12.....                                                                                                | 26 |
| 1-CF <sub>3</sub> PCM acetonitrile M06L/def2-TZVP .....                                                      | 26 |
| 1-CF <sub>3</sub> three acetonitrile M06L/def2-TZVP .....                                                    | 26 |
| 1-CF <sub>3</sub> PCM water M06L/def2-TZVP (Tight convergence criteria and ultrafine integration grid).....  | 27 |
| 1-CF <sub>3</sub> three water M06L/def2-TZVP (Tight convergence criteria and ultrafine integration grid).... | 27 |
| checkCIF results.....                                                                                        | 28 |
| CpMo( $\eta^2$ -O <sub>2</sub> )OCH <sub>3</sub> .....                                                       | 28 |
| CpMo( $\eta^2$ -O <sub>2</sub> )OCl.....                                                                     | 31 |
| CpMo( $\eta^2$ -O <sub>2</sub> )OCF <sub>3</sub> .....                                                       | 34 |

## Cartesian coordinate of reported complexes

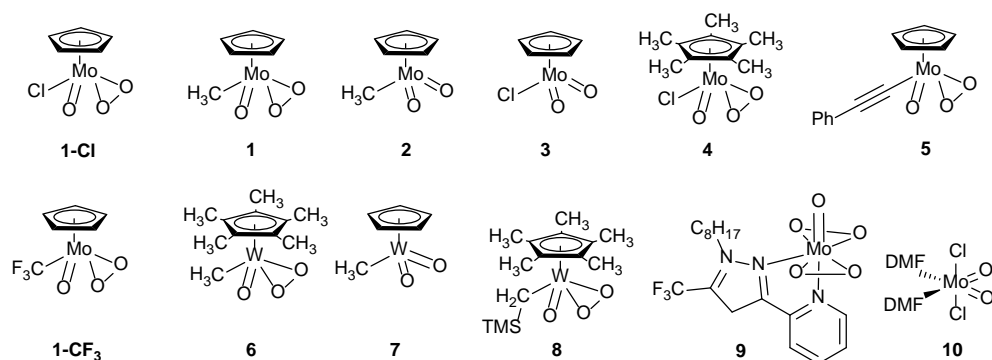

Table 1 and Figure 1

### 1-C1 at M06/def2-TZVP

|    |             |             |             |
|----|-------------|-------------|-------------|
| Mo | -0.39394400 | 0.01079300  | 0.20693800  |
| O  | -1.87850900 | -0.67009200 | -0.79735600 |
| O  | -1.18024500 | -1.69730400 | -0.13516400 |
| O  | -0.84188400 | 0.50146600  | 1.73857800  |
| C  | -1.10753900 | 1.80111800  | -0.79139100 |
| C  | 1.55386100  | -1.12503100 | -0.78720600 |
| C  | 1.76001800  | -0.93215900 | 0.61234400  |
| C  | 1.89384300  | 0.44970700  | 0.84709700  |
| C  | 1.64834200  | 1.11230300  | -0.36734200 |
| C  | 1.47619900  | 0.12383400  | -1.38843900 |
| H  | -2.18857000 | 1.78819100  | -0.66043900 |
| H  | -0.86799800 | 1.78332300  | -1.85395700 |
| H  | -0.68792500 | 2.69175300  | -0.32313900 |
| H  | 1.37476900  | -2.07595900 | -1.26512000 |
| H  | 1.83526400  | -1.71537000 | 1.35203900  |
| H  | 2.03405000  | 0.91846700  | 1.80887400  |
| H  | 1.64821100  | 2.17975500  | -0.52285000 |
| H  | 1.25459600  | 0.32534000  | -2.42566000 |

### 1-C2 at M06/def2-TZVP

|    |             |             |             |
|----|-------------|-------------|-------------|
| Mo | -0.39083700 | 0.00692200  | 0.20475100  |
| O  | -1.92047900 | -0.60931000 | -0.77444800 |
| O  | -1.21987300 | -1.67235400 | -0.17254300 |
| O  | -0.78820000 | 0.45084100  | 1.76467000  |
| C  | -1.09116400 | 1.83266100  | -0.73219300 |
| C  | 1.46759400  | -0.82217000 | -1.16627000 |
| C  | 1.67040200  | -1.20308500 | 0.18922800  |
| C  | 1.92760200  | -0.03752700 | 0.94308300  |
| C  | 1.76380200  | 1.06216500  | 0.09297700  |
| C  | 1.50164000  | 0.56882500  | -1.22563200 |
| H  | -2.11720600 | 1.94327800  | -0.38315800 |
| H  | -1.08981400 | 1.73476900  | -1.81661700 |

|   |             |             |             |
|---|-------------|-------------|-------------|
| H | -0.49854500 | 2.69516500  | -0.42602100 |
| H | 1.20715200  | -1.49208400 | -1.97174800 |
| H | 1.64716600  | -2.21482400 | 0.56669800  |
| H | 2.08730600  | 0.00357200  | 2.00954800  |
| H | 1.83543200  | 2.10223900  | 0.37274800  |
| H | 1.33283300  | 1.17853200  | -2.09959300 |

## Table 2

### 1-C2 at M06/SVP

|    |             |             |             |
|----|-------------|-------------|-------------|
| Mo | -0.39532100 | 0.01733000  | 0.21017900  |
| O  | -1.84769300 | -0.71497400 | -0.81268200 |
| O  | -1.15742300 | -1.71020000 | -0.09210400 |
| O  | -0.87016100 | 0.55391600  | 1.71629200  |
| C  | -1.11768800 | 1.76550100  | -0.83684200 |
| C  | 1.57316800  | -1.16412700 | -0.71095300 |
| C  | 1.76178800  | -0.87409300 | 0.67975000  |
| C  | 1.87518200  | 0.52805700  | 0.82385600  |
| C  | 1.63145300  | 1.10703100  | -0.44108600 |
| C  | 1.48151400  | 0.04648900  | -1.39806200 |
| H  | -2.20874200 | 1.73721600  | -0.70419600 |
| H  | -0.87735500 | 1.72549900  | -1.90929000 |
| H  | -0.71186200 | 2.68208600  | -0.38301200 |
| H  | 1.41292600  | -2.15687800 | -1.13130500 |
| H  | 1.84878100  | -1.61270400 | 1.47775200  |
| H  | 2.01037000  | 1.06733700  | 1.76139400  |
| H  | 1.62914700  | 2.17225200  | -0.67059800 |
| H  | 1.26991200  | 0.17425700  | -2.46028900 |

### 1-C2 at M06/SVPD

|    |             |             |             |
|----|-------------|-------------|-------------|
| Mo | -0.38642700 | 0.01082600  | 0.20653000  |
| O  | -1.92747600 | -0.61449400 | -0.76430300 |
| O  | -1.23499100 | -1.67090900 | -0.13914400 |
| O  | -0.76272500 | 0.48764900  | 1.76351700  |
| C  | -1.08240700 | 1.82072000  | -0.74402000 |
| C  | 1.42607400  | -0.60339800 | -1.31741000 |
| C  | 1.61515200  | -1.28370000 | -0.08577200 |
| C  | 1.90681300  | -0.32158900 | 0.91973300  |
| C  | 1.82044600  | 0.95326900  | 0.33101400  |
| C  | 1.52310000  | 0.77845600  | -1.05870800 |
| H  | -2.11771200 | 1.92383300  | -0.39420600 |
| H  | -1.07577500 | 1.71773600  | -1.83709200 |
| H  | -0.48801000 | 2.69052400  | -0.42985700 |
| H  | 1.13516300  | -1.06445700 | -2.26009300 |
| H  | 1.52811700  | -2.35903700 | 0.06232500  |
| H  | 2.06508800  | -0.52984500 | 1.97632100  |
| H  | 1.92951300  | 1.90755700  | 0.84413700  |
| H  | 1.40002800  | 1.57847100  | -1.78537400 |

### 1-C2 at M06/TZVPD

|    |             |             |             |
|----|-------------|-------------|-------------|
| Mo | -0.39102100 | 0.00647000  | 0.20496300  |
| O  | -1.92225500 | -0.60782100 | -0.77399200 |
| O  | -1.22487300 | -1.67148500 | -0.16967300 |
| O  | -0.78428200 | 0.45398500  | 1.76514500  |
| C  | -1.08988700 | 1.83343400  | -0.73130100 |
| C  | 1.46149600  | -0.78224100 | -1.19762000 |
| C  | 1.66334000  | -1.22120200 | 0.13878900  |
| C  | 1.92734200  | -0.09020700 | 0.94241700  |
| C  | 1.77599100  | 1.04594800  | 0.13951300  |
| C  | 1.50597600  | 0.61129800  | -1.19705000 |
| H  | -2.11312700 | 1.94780700  | -0.37577500 |
| H  | -1.09433700 | 1.73417000  | -1.81534200 |
| H  | -0.49158600 | 2.69334700  | -0.42898900 |
| H  | 1.19495900  | -1.41431700 | -2.03105500 |
| H  | 1.62961000  | -2.24726400 | 0.47373700  |
| H  | 2.08710300  | -0.09630400 | 2.00951800  |
| H  | 1.85222700  | 2.07265500  | 0.46373800  |
| H  | 1.34374200  | 1.25856300  | -2.04461400 |

### Table 3

#### 1-C2 at M06/Mo:LANL2TZ(f) and Non-Mo:6-311+G(d,p)

|    |             |             |             |
|----|-------------|-------------|-------------|
| Mo | -0.38950500 | 0.01645600  | 0.21408800  |
| O  | -1.90615100 | -0.64469500 | -0.79475200 |
| O  | -1.23029900 | -1.68732500 | -0.13114200 |
| O  | -0.81242400 | 0.51563900  | 1.75042900  |
| C  | -1.09252500 | 1.80757800  | -0.78925500 |
| C  | 1.47665100  | -0.85864500 | -1.14376600 |
| C  | 1.67393800  | -1.19889000 | 0.22619800  |
| C  | 1.92684500  | -0.00928300 | 0.94742100  |
| C  | 1.75819600  | 1.06634400  | 0.06274300  |
| C  | 1.50838100  | 0.53110000  | -1.24544300 |
| H  | -2.12504800 | 1.91484900  | -0.45075400 |
| H  | -1.07755200 | 1.67443700  | -1.87207800 |
| H  | -0.50724300 | 2.68320900  | -0.49751600 |
| H  | 1.22435700  | -1.55515300 | -1.93152700 |
| H  | 1.65673000  | -2.20149800 | 0.63292900  |
| H  | 2.09004600  | 0.06378200  | 2.01370600  |
| H  | 1.83630200  | 2.11628500  | 0.31010200  |
| H  | 1.34368800  | 1.11473700  | -2.14022100 |

#### 1-C2 at M06/Mo:LANL2TZ(f) and Non-Mo:ACCT

|    |             |             |             |
|----|-------------|-------------|-------------|
| Mo | -0.39118600 | 0.00670700  | 0.20712300  |
| O  | -1.93326500 | -0.60182200 | -0.77016300 |
| O  | -1.23974200 | -1.67018400 | -0.16854600 |
| O  | -0.77432100 | 0.45966500  | 1.76731800  |

|   |             |             |             |
|---|-------------|-------------|-------------|
| C | -1.08768600 | 1.83855400  | -0.73327200 |
| C | 1.45658700  | -0.77160300 | -1.21007700 |
| C | 1.66155700  | -1.23008200 | 0.11802800  |
| C | 1.93437100  | -0.11202300 | 0.93682200  |
| C | 1.78827500  | 1.03514900  | 0.15115200  |
| C | 1.50802800  | 0.62122100  | -1.18937400 |
| H | -2.10655300 | 1.95218100  | -0.36922300 |
| H | -1.09741400 | 1.73069400  | -1.81512400 |
| H | -0.48284300 | 2.69382900  | -0.43538400 |
| H | 1.18455800  | -1.38988600 | -2.05034700 |
| H | 1.62459400  | -2.25933100 | 0.43806800  |
| H | 2.09950400  | -0.13467500 | 2.00149300  |
| H | 1.87141000  | 2.05571700  | 0.48882000  |
| H | 1.34838500  | 1.28119500  | -2.02599300 |

### 1-C2 at M06/Mo:LANL2DZmod and Non-Mo:6-311+G(d,p)

|    |             |             |             |
|----|-------------|-------------|-------------|
| Mo | -0.38430400 | 0.02824700  | 0.21981300  |
| O  | -1.91573800 | -0.68091700 | -0.78276600 |
| O  | -1.24458800 | -1.70167800 | -0.08340100 |
| O  | -0.80700500 | 0.59622800  | 1.75999200  |
| C  | -1.09534700 | 1.78291200  | -0.85390000 |
| C  | 1.46502500  | -0.89340000 | -1.12942400 |
| C  | 1.67203200  | -1.20216800 | 0.24638600  |
| C  | 1.93483600  | 0.00369200  | 0.93848200  |
| C  | 1.76415600  | 1.05957000  | 0.02887300  |
| C  | 1.50064700  | 0.49394700  | -1.26401400 |
| H  | -2.11946100 | 1.90729300  | -0.49739700 |
| H  | -1.10245900 | 1.59456300  | -1.92818600 |
| H  | -0.49795700 | 2.66522000  | -0.61258200 |
| H  | 1.20238800  | -1.60683800 | -1.89825600 |
| H  | 1.65315600  | -2.19470300 | 0.67667300  |
| H  | 2.10932600  | 0.10086100  | 2.00095200  |
| H  | 1.85295800  | 2.11457300  | 0.24940000  |
| H  | 1.33337500  | 1.05625600  | -2.17176800 |

### 1-C2 at M06/Mo:LANL2DZmod and Non-Mo:ACCT

|    |             |             |             |
|----|-------------|-------------|-------------|
| Mo | -0.38665200 | 0.01215500  | 0.20780700  |
| O  | -1.93631700 | -0.61560000 | -0.76662800 |
| O  | -1.25099600 | -1.67455600 | -0.14402000 |
| O  | -0.77554400 | 0.49872900  | 1.77279700  |
| C  | -1.08437800 | 1.82684500  | -0.76109400 |
| C  | 1.44751900  | -0.77589800 | -1.21279300 |
| C  | 1.65309400  | -1.23951200 | 0.11271300  |
| C  | 1.93311500  | -0.12538200 | 0.93529400  |
| C  | 1.79423500  | 1.02556800  | 0.15307000  |
| C  | 1.50761300  | 0.61716300  | -1.18755500 |
| H  | -2.10019600 | 1.94601100  | -0.39118900 |

|   |             |             |             |
|---|-------------|-------------|-------------|
| H | -1.10126200 | 1.70291600  | -1.84078700 |
| H | -0.47698500 | 2.68525900  | -0.47856900 |
| H | 1.16779600  | -1.38894200 | -2.05423500 |
| H | 1.60895200  | -2.26890700 | 0.43099800  |
| H | 2.10032300  | -0.15263500 | 1.99951100  |
| H | 1.88405000  | 2.04441800  | 0.49388200  |
| H | 1.35237000  | 1.28010400  | -2.02250400 |

**Table 4**

**1-C2 at M06L/def2-TZVP**

|    |             |             |             |
|----|-------------|-------------|-------------|
| Mo | -0.39228800 | 0.00985600  | 0.20660100  |
| O  | -1.88847100 | -0.66547700 | -0.80417300 |
| O  | -1.17689900 | -1.71124500 | -0.13662400 |
| O  | -0.83698200 | 0.49856700  | 1.75653500  |
| C  | -1.10770900 | 1.81504400  | -0.78595800 |
| C  | 1.55769300  | -1.16184800 | -0.71746800 |
| C  | 1.77457200  | -0.87650400 | 0.66354800  |
| C  | 1.88739300  | 0.52044900  | 0.80725700  |
| C  | 1.63769500  | 1.09939000  | -0.45118800 |
| C  | 1.46754400  | 0.04654600  | -1.40218300 |
| H  | -2.18778400 | 1.80537400  | -0.66094100 |
| H  | -0.86636400 | 1.81305000  | -1.84630500 |
| H  | -0.69201400 | 2.70198100  | -0.31070600 |
| H  | 1.38773500  | -2.14227800 | -1.13191400 |
| H  | 1.86461400  | -1.60776400 | 1.45143200  |
| H  | 2.02581900  | 1.05281300  | 1.73414500  |
| H  | 1.62239200  | 2.15315200  | -0.67513900 |
| H  | 1.23737100  | 0.17649200  | -2.44776000 |

**1-C2 at M06-2X/def2-TZVP**

|    |             |             |             |
|----|-------------|-------------|-------------|
| Mo | -0.39854100 | 0.00782600  | 0.20845100  |
| O  | -1.91908800 | -0.57364200 | -0.79463900 |
| O  | -1.22287600 | -1.65808000 | -0.21839200 |
| O  | -0.81113400 | 0.39181200  | 1.76787000  |
| C  | -1.07761600 | 1.83726800  | -0.70709300 |
| C  | 1.47061800  | -0.78060200 | -1.19511300 |
| C  | 1.66383100  | -1.22217800 | 0.14540500  |
| C  | 1.93355400  | -0.08999200 | 0.95006300  |
| C  | 1.79181300  | 1.04747300  | 0.14544900  |
| C  | 1.52457200  | 0.61287800  | -1.19536300 |
| H  | -2.10464700 | 1.95005000  | -0.36654800 |
| H  | -1.06646300 | 1.74343000  | -1.79016100 |
| H  | -0.48152100 | 2.69128300  | -0.38987000 |
| H  | 1.20973600  | -1.41152500 | -2.02943900 |
| H  | 1.62669200  | -2.24689700 | 0.47992700  |
| H  | 2.09258000  | -0.09688100 | 2.01614400  |
| H  | 1.87682100  | 2.07224500  | 0.46941100  |



|   |            |            |             |
|---|------------|------------|-------------|
| H | 1.36966800 | 1.25980300 | -2.04321500 |
|---|------------|------------|-------------|

### 1-C2 at PBE0/def2-TZVP

|    |             |             |             |
|----|-------------|-------------|-------------|
| Mo | -0.39273700 | 0.01018000  | 0.20300900  |
| O  | -1.88125500 | -0.66053500 | -0.79294200 |
| O  | -1.17109100 | -1.69667900 | -0.14460600 |
| O  | -0.84083500 | 0.47907300  | 1.74131400  |
| C  | -1.11750100 | 1.79498600  | -0.77616800 |
| C  | 1.56216600  | -1.14950300 | -0.73085100 |
| C  | 1.77170300  | -0.88418100 | 0.65688900  |
| C  | 1.88312700  | 0.51004300  | 0.82235400  |
| C  | 1.63584700  | 1.10891700  | -0.42818200 |
| C  | 1.47677400  | 0.06886700  | -1.39779700 |
| H  | -2.19596100 | 1.78069600  | -0.62068600 |
| H  | -0.90517900 | 1.77773900  | -1.84461800 |
| H  | -0.69160700 | 2.68900800  | -0.31943200 |
| H  | 1.39765000  | -2.12496300 | -1.16201700 |
| H  | 1.85548600  | -1.62793000 | 1.43557200  |
| H  | 2.02028700  | 1.02875800  | 1.75855700  |
| H  | 1.62861900  | 2.16702100  | -0.63611800 |
| H  | 1.25841700  | 0.21248700  | -2.44521800 |

### 1-C2 at B3LYP/def2-TZVP

|    |             |             |             |
|----|-------------|-------------|-------------|
| Mo | -0.40730300 | 0.00872200  | 0.20234900  |
| O  | -1.89411700 | -0.67661900 | -0.81764700 |
| O  | -1.16671900 | -1.72334800 | -0.15460100 |
| O  | -0.88098000 | 0.47181600  | 1.74713000  |
| C  | -1.14475600 | 1.81118800  | -0.78682900 |
| C  | 1.60557600  | -1.11558900 | -0.77747400 |
| C  | 1.79076600  | -0.91832400 | 0.62937300  |
| C  | 1.90206300  | 0.46878100  | 0.86545100  |
| C  | 1.67330900  | 1.12999000  | -0.35900800 |
| C  | 1.52879200  | 0.13548600  | -1.38439000 |
| H  | -2.22176600 | 1.79637800  | -0.63313800 |
| H  | -0.92818800 | 1.79225700  | -1.85291200 |
| H  | -0.71742800 | 2.70176600  | -0.32800000 |
| H  | 1.45575400  | -2.06799800 | -1.25874600 |
| H  | 1.87048600  | -1.69908300 | 1.36916500  |
| H  | 2.03353000  | 0.93991300  | 1.82555800  |
| H  | 1.67636400  | 2.19544800  | -0.51528100 |
| H  | 1.33799100  | 0.33102700  | -2.42711400 |

### 1-C2 at B3PW91/def2-TZVP

|    |             |             |             |
|----|-------------|-------------|-------------|
| Mo | -0.39667800 | 0.00941300  | 0.20099700  |
| O  | -1.88652100 | -0.66840700 | -0.79951600 |

|   |             |             |             |
|---|-------------|-------------|-------------|
| O | -1.16977600 | -1.70667800 | -0.14399000 |
| O | -0.85322900 | 0.47818900  | 1.74273800  |
| C | -1.13071300 | 1.80050500  | -0.77748900 |
| C | 1.57824100  | -1.14302200 | -0.73597100 |
| C | 1.77951300  | -0.88713900 | 0.65621100  |
| C | 1.88741700  | 0.50720200  | 0.83241900  |
| C | 1.64643000  | 1.11517800  | -0.41623900 |
| C | 1.49405900  | 0.08090500  | -1.39503400 |
| H | -2.20795400 | 1.78680800  | -0.61617400 |
| H | -0.92384000 | 1.78501100  | -1.84665900 |
| H | -0.70220500 | 2.69312600  | -0.32114500 |
| H | 1.42321400  | -2.11581200 | -1.17592000 |
| H | 1.86405400  | -1.63633000 | 1.42924900  |
| H | 2.02328800  | 1.01941200  | 1.77207500  |
| H | 1.64350000  | 2.17438600  | -0.61706200 |
| H | 1.28696400  | 0.23146300  | -2.44346500 |

### 1-C2 at MP2/def2-SVP

|    |             |             |             |
|----|-------------|-------------|-------------|
| Mo | -0.39166400 | 0.00783000  | 0.20038100  |
| O  | -1.86827700 | -0.66360600 | -0.86784200 |
| O  | -1.18108800 | -1.73321500 | -0.15574600 |
| O  | -0.96220800 | 0.47339900  | 1.74138100  |
| C  | -1.11138200 | 1.82564900  | -0.78308100 |
| C  | 1.61028700  | -1.19166300 | -0.62274500 |
| C  | 1.78131200  | -0.81615900 | 0.75358100  |
| C  | 1.86460200  | 0.60121900  | 0.81285300  |
| C  | 1.65146000  | 1.10077900  | -0.50082700 |
| C  | 1.52955200  | -0.01753200 | -1.39198800 |
| H  | -2.20498100 | 1.81859100  | -0.66765100 |
| H  | -0.86172300 | 1.82244400  | -1.85435800 |
| H  | -0.69489900 | 2.72650500  | -0.30564800 |
| H  | 1.48073700  | -2.20961500 | -0.98890500 |
| H  | 1.88142500  | -1.50263300 | 1.59516900  |
| H  | 2.00239000  | 1.20047800  | 1.71299200  |
| H  | 1.64353700  | 2.14974100  | -0.79260800 |
| H  | 1.34099900  | 0.03924200  | -2.46407800 |

### 1-C2 at MP2/def2-SVPD

|    |             |             |             |
|----|-------------|-------------|-------------|
| Mo | -0.38856500 | 0.00523900  | 0.20192700  |
| O  | -1.90614900 | -0.62825000 | -0.84212900 |
| O  | -1.20249300 | -1.72872700 | -0.16915900 |
| O  | -0.90725100 | 0.46179400  | 1.77015700  |
| C  | -1.10342400 | 1.84250100  | -0.76438700 |
| C  | 1.58896800  | -1.19622600 | -0.65125000 |
| C  | 1.79036900  | -0.83624500 | 0.72899300  |
| C  | 1.88373400  | 0.58260500  | 0.80369200  |
| C  | 1.64975900  | 1.09901300  | -0.50399200 |
| C  | 1.50733000  | -0.00991100 | -1.40898800 |

|   |             |             |             |
|---|-------------|-------------|-------------|
| H | -2.19693100 | 1.83421400  | -0.65211800 |
| H | -0.84538000 | 1.83833100  | -1.83364400 |
| H | -0.68508300 | 2.73806300  | -0.27948000 |
| H | 1.43769400  | -2.20695600 | -1.02511400 |
| H | 1.88777400  | -1.53190300 | 1.56154100  |
| H | 2.02368400  | 1.17032500  | 1.70919400  |
| H | 1.63670200  | 2.14998200  | -0.78354100 |
| H | 1.28799100  | 0.05896300  | -2.47313600 |

### 1-C2 at MP2/def2-TZVP

|    |             |             |             |
|----|-------------|-------------|-------------|
| Mo | -0.38427700 | 0.00248800  | 0.20048400  |
| O  | -1.90410700 | -0.62014200 | -0.82249100 |
| O  | -1.19875600 | -1.71902700 | -0.17183200 |
| O  | -0.88549500 | 0.45989900  | 1.77139800  |
| C  | -1.10238800 | 1.83245900  | -0.75861400 |
| C  | 1.57344700  | -1.16684400 | -0.70130000 |
| C  | 1.78049200  | -0.86968500 | 0.68451500  |
| C  | 1.88113100  | 0.53603300  | 0.81897200  |
| C  | 1.64190800  | 1.10741800  | -0.45400100 |
| C  | 1.49010100  | 0.04374500  | -1.40106800 |
| H  | -2.18795500 | 1.82407700  | -0.64263800 |
| H  | -0.85258500 | 1.83001200  | -1.82135600 |
| H  | -0.68752800 | 2.72340600  | -0.28058000 |
| H  | 1.41222600  | -2.15262300 | -1.11300300 |
| H  | 1.86980900  | -1.59585000 | 1.48094900  |
| H  | 2.01551700  | 1.07870600  | 1.74384700  |
| H  | 1.62429500  | 2.16219700  | -0.68361500 |
| H  | 1.26458100  | 0.16099400  | -2.45155200 |

## Table 5

### 1-CF<sub>3</sub> at M06L/def2-TZVP

|    |             |             |             |
|----|-------------|-------------|-------------|
| Mo | 0.28729000  | 0.45229800  | -0.24543700 |
| F  | -2.05561100 | -0.61205000 | 1.38001300  |
| F  | -1.91213000 | -1.60345600 | -0.54001200 |
| F  | -2.68130600 | 0.40710600  | -0.41348300 |
| O  | -0.58970300 | 1.81429500  | 0.79286600  |
| O  | 0.78141700  | 2.12602700  | 0.55007200  |
| O  | 0.04980700  | 0.66414500  | -1.89976900 |
| C  | 2.21295100  | -0.92778600 | -0.73743800 |
| C  | 1.11578100  | -1.77439300 | -0.53348600 |
| C  | 0.71279200  | -1.65095400 | 0.83098800  |
| C  | 1.56516900  | -0.72762100 | 1.45812100  |
| C  | 2.46299600  | -0.24338600 | 0.47943500  |
| C  | -1.74873500 | -0.41012900 | 0.08305500  |
| H  | 2.71446700  | -0.75230300 | -1.67578300 |
| H  | 0.62993900  | -2.38522600 | -1.27741700 |
| H  | -0.10817400 | -2.17584900 | 1.29117800  |

|   |            |             |            |
|---|------------|-------------|------------|
| H | 1.47725900 | -0.36347900 | 2.46959700 |
| H | 3.20387200 | 0.52584300  | 0.63270500 |

### 1-CF<sub>3</sub> at M06-2X/def2-TZVP

|    |             |             |             |
|----|-------------|-------------|-------------|
| Mo | -0.27395800 | -0.45046900 | -0.24641800 |
| F  | 2.04530500  | 0.61151500  | 1.37544100  |
| F  | 1.89301700  | 1.61544500  | -0.52278200 |
| F  | 2.67007200  | -0.37847200 | -0.42001000 |
| O  | 0.60437500  | -1.79282100 | 0.79304200  |
| O  | -0.73946700 | -2.12032200 | 0.55067400  |
| O  | -0.02871500 | -0.66431500 | -1.88319000 |
| C  | -2.21880500 | 0.90120900  | -0.75063500 |
| C  | -1.14108700 | 1.76492600  | -0.52892700 |
| C  | -0.75413900 | 1.64240700  | 0.84136700  |
| C  | -1.59684600 | 0.70206900  | 1.45151900  |
| C  | -2.47098400 | 0.20438000  | 0.45875700  |
| C  | 1.74487700  | 0.42598600  | 0.08629100  |
| H  | -2.70569000 | 0.72202400  | -1.69730100 |
| H  | -0.66007300 | 2.39304800  | -1.26316900 |
| H  | 0.04319400  | 2.18919300  | 1.31949900  |
| H  | -1.51571800 | 0.33442900  | 2.46364600  |
| H  | -3.19866300 | -0.58157300 | 0.59859000  |

### 1-CF3 at M06-2X/def2-TZVP

|    |             |             |             |
|----|-------------|-------------|-------------|
| Mo | -0.26499500 | -0.46260600 | -0.24777500 |
| F  | 2.01649200  | 0.65204000  | 1.36625900  |
| F  | 1.85985800  | 1.62206900  | -0.55423200 |
| F  | 2.66603700  | -0.36608000 | -0.41253700 |
| O  | 0.62713300  | -1.76899700 | 0.81433400  |
| O  | -0.72443800 | -2.10378700 | 0.60168700  |
| O  | -0.05120500 | -0.74444200 | -1.86540200 |
| C  | -2.19988900 | 0.92096900  | -0.77039800 |
| C  | -1.12060500 | 1.77691800  | -0.52705300 |
| C  | -0.75300800 | 1.64331600  | 0.85340900  |
| C  | -1.60576800 | 0.70073800  | 1.44299800  |
| C  | -2.46682900 | 0.20800700  | 0.43010300  |
| C  | 1.71842000  | 0.43412500  | 0.07539400  |
| H  | -2.67497000 | 0.75289800  | -1.72371600 |
| H  | -0.62562900 | 2.40829100  | -1.24720500 |
| H  | 0.04552600  | 2.17656200  | 1.34312000  |
| H  | -1.54205700 | 0.32595100  | 2.45219200  |
| H  | -3.20040100 | -0.57314900 | 0.55505300  |

**Table 6****1-Cl at M06L/def2-TZVP**

|    |             |             |             |
|----|-------------|-------------|-------------|
| Mo | -0.22796000 | -0.27580100 | 0.19637100  |
| O  | -1.49779600 | -1.39223400 | -0.70451100 |
| O  | -0.23511900 | -2.04237500 | -0.54102000 |
| O  | -0.44302000 | -0.45879700 | 1.85053100  |
| C  | 1.93729100  | 0.62430600  | 0.90987300  |
| C  | 1.29003600  | 1.59407000  | 0.14151100  |
| C  | 1.19823300  | 1.11237000  | -1.21083800 |
| C  | 1.73074800  | -0.16820300 | -1.24193400 |
| C  | 2.12640900  | -0.51055800 | 0.09255000  |
| H  | 2.10638100  | 0.66948800  | 1.97317500  |
| H  | 0.91796500  | 2.54449400  | 0.48762100  |
| H  | 0.72717800  | 1.63580100  | -2.02675800 |
| H  | 1.73749700  | -0.84055600 | -2.08449700 |
| H  | 2.54378200  | -1.45715200 | 0.39942800  |
| Cl | -1.80866400 | 1.42746600  | -0.23432400 |

**1-Cl at M06/def2-TZVP**

|    |             |             |             |
|----|-------------|-------------|-------------|
| Mo | -0.23271400 | -0.27335500 | 0.19731900  |
| O  | -1.49701700 | -1.37104600 | -0.71290700 |
| O  | -0.26340800 | -2.02566700 | -0.54693500 |
| O  | -0.45446800 | -0.46779100 | 1.83306700  |
| C  | 1.94797900  | 0.58106900  | 0.91567500  |
| C  | 1.31209900  | 1.57553100  | 0.17187700  |
| C  | 1.21422600  | 1.12500000  | -1.19206300 |
| C  | 1.72665000  | -0.15920600 | -1.25280400 |
| C  | 2.11368100  | -0.53904700 | 0.07455500  |
| H  | 2.12098800  | 0.59994900  | 1.98048900  |
| H  | 0.95727000  | 2.52614200  | 0.53920000  |
| H  | 0.74990400  | 1.67434100  | -1.99639400 |
| H  | 1.72136700  | -0.81402400 | -2.11066200 |
| H  | 2.51487000  | -1.50061700 | 0.35945000  |
| Cl | -1.79171200 | 1.43594400  | -0.23227700 |

**1-Cl at M06-2X/def2-TZVP**

|    |             |             |             |
|----|-------------|-------------|-------------|
| Mo | -0.23581000 | -0.27947200 | 0.20368400  |
| O  | -1.49209600 | -1.33336200 | -0.74929400 |
| O  | -0.27175200 | -2.01571500 | -0.56862400 |
| O  | -0.47241500 | -0.51350300 | 1.81833700  |
| C  | 1.95632000  | 0.56518100  | 0.92142900  |
| C  | 1.32183700  | 1.57432200  | 0.19236800  |
| C  | 1.21661200  | 1.14081600  | -1.18095000 |
| C  | 1.72179800  | -0.14580300 | -1.26071500 |
| C  | 2.11358900  | -0.54587300 | 0.06308400  |
| H  | 2.13737500  | 0.56972600  | 1.98382100  |
| H  | 0.97072100  | 2.51965600  | 0.57295200  |
| H  | 0.74985100  | 1.70085500  | -1.97495700 |
| H  | 1.70822000  | -0.78929000 | -2.12547400 |

|    |             |             |             |
|----|-------------|-------------|-------------|
| H  | 2.50766900  | -1.51302900 | 0.33348500  |
| Cl | -1.78003800 | 1.44815800  | -0.22112800 |

## Table 7

### 2 at M06L/def2-TZVP

|    |             |             |             |
|----|-------------|-------------|-------------|
| Mo | -0.53944000 | -0.16624000 | -0.00047000 |
| O  | -1.27470100 | -0.81918200 | -1.38988000 |
| O  | -1.30240100 | -0.79416000 | 1.38515400  |
| C  | -1.31173500 | 1.84356000  | -0.01977700 |
| C  | 1.63217600  | -0.38978000 | -1.11009500 |
| C  | 1.58038100  | -1.12756500 | 0.10833300  |
| C  | 1.60514700  | -0.19863200 | 1.18565400  |
| C  | 1.56147800  | 1.08235700  | 0.63664500  |
| C  | 1.58297100  | 0.96370600  | -0.78534300 |
| H  | -2.39500100 | 1.73220200  | -0.06444600 |
| H  | -0.97373100 | 2.40466600  | -0.88866700 |
| H  | -1.04644200 | 2.38547900  | 0.88582200  |
| H  | 1.60409700  | -0.81375800 | -2.10078900 |
| H  | 1.59482900  | -2.20306100 | 0.19848400  |
| H  | 1.55322600  | -0.45164400 | 2.23203400  |
| H  | 1.50073200  | 2.00852400  | 1.18592100  |
| H  | 1.53309400  | 1.78455300  | -1.48331200 |

### 2 at M06/def2-TZVP

|    |             |             |             |
|----|-------------|-------------|-------------|
| Mo | -0.53308500 | -0.17355900 | -0.00059800 |
| O  | -1.24877100 | -0.82984800 | -1.38298700 |
| O  | -1.29506700 | -0.79562200 | 1.37198400  |
| C  | -1.35066400 | 1.81291900  | -0.02935100 |
| C  | 1.64832400  | -0.44138400 | -1.07141400 |
| C  | 1.60256800  | -1.09660400 | 0.19359800  |
| C  | 1.59891000  | -0.09905200 | 1.20450300  |
| C  | 1.52415700  | 1.14021700  | 0.57005400  |
| C  | 1.56535100  | 0.92792800  | -0.84060900 |
| H  | -2.42975300 | 1.67322900  | -0.11453900 |
| H  | -0.99067600 | 2.39045900  | -0.88064800 |
| H  | -1.12763500 | 2.34316400  | 0.89652500  |
| H  | 1.63949800  | -0.93170200 | -2.03268500 |
| H  | 1.63734500  | -2.16419100 | 0.35576700  |
| H  | 1.54080300  | -0.28164800 | 2.26649200  |
| H  | 1.43827400  | 2.10077700  | 1.05532600  |
| H  | 1.50053800  | 1.69900300  | -1.59376300 |

## 2 at M06-2X/def2-TZVP

|    |             |             |             |
|----|-------------|-------------|-------------|
| Mo | 0.54179800  | -0.17421300 | 0.00001200  |
| O  | 1.27557100  | -0.80514700 | 1.37262600  |
| O  | 1.27624800  | -0.80510600 | -1.37224800 |
| C  | 1.35165100  | 1.80749900  | 0.00019300  |
| C  | -1.63772000 | -0.27780900 | 1.15181400  |
| C  | -1.61926000 | -1.11357900 | -0.00238400 |
| C  | -1.63706800 | -0.27366200 | -1.15346900 |
| C  | -1.55165400 | 1.04633000  | -0.71428300 |
| C  | -1.55218600 | 1.04375700  | 0.71754200  |
| H  | 2.43341800  | 1.67537100  | 0.00089900  |
| H  | 1.05405200  | 2.35702800  | 0.89102000  |
| H  | 1.05518800  | 2.35670400  | -0.89120500 |
| H  | -1.60738000 | -0.62041500 | 2.17327000  |
| H  | -1.65637900 | -2.19182800 | -0.00437100 |
| H  | -1.60616500 | -0.61251600 | -2.17615100 |
| H  | -1.48228800 | 1.92215700  | -1.33933000 |
| H  | -1.48309000 | 1.91726500  | 1.34586300  |

## 2 at PBE0/def2-TZVP

|    |             |             |             |
|----|-------------|-------------|-------------|
| Mo | -0.52937900 | -0.17363500 | -0.00135600 |
| O  | -1.23132800 | -0.83611200 | -1.38760900 |
| O  | -1.29235400 | -0.81042100 | 1.36333800  |
| C  | -1.38227300 | 1.78925900  | -0.03042800 |
| C  | 1.66140500  | -0.57164600 | -0.98446700 |
| C  | 1.61530000  | -1.04998500 | 0.35980300  |
| C  | 1.58168000  | 0.07207700  | 1.22384100  |
| C  | 1.50367300  | 1.21839300  | 0.42296800  |
| C  | 1.57462000  | 0.81922300  | -0.94415000 |
| H  | -2.45874700 | 1.62479000  | -0.11602600 |
| H  | -1.03758200 | 2.37254800  | -0.88476800 |
| H  | -1.17474900 | 2.32926000  | 0.89378600  |
| H  | 1.67618800  | -1.18760300 | -1.87046900 |
| H  | 1.65129300  | -2.08561700 | 0.66541900  |
| H  | 1.51158300  | 0.03520500  | 2.30022000  |
| H  | 1.41148400  | 2.23436800  | 0.77529700  |
| H  | 1.51746900  | 1.47805500  | -1.79775300 |

## 2 at B3LYP/def2-TZVP

|    |             |             |             |
|----|-------------|-------------|-------------|
| Mo | -0.54882000 | -0.16928500 | -0.00001000 |
| O  | -1.30639800 | -0.80076300 | -1.38466000 |
| O  | -1.30723900 | -0.80023700 | 1.38440300  |
| C  | -1.35487200 | 1.83571200  | -0.00049700 |
| C  | 1.64783200  | -0.29565600 | -1.15372700 |
| C  | 1.60617300  | -1.13157600 | 0.00336700  |
| C  | 1.64705600  | -0.28972100 | 1.15604700  |

|   |             |             |             |
|---|-------------|-------------|-------------|
| C | 1.60311200  | 1.03398100  | 0.71426700  |
| C | 1.60377600  | 1.03027800  | -0.71892100 |
| H | -2.43757700 | 1.70335300  | -0.00139900 |
| H | -1.05765900 | 2.38703000  | -0.89135000 |
| H | -1.05913200 | 2.38674400  | 0.89102300  |
| H | 1.61965700  | -0.63728800 | -2.17537400 |
| H | 1.63016100  | -2.21033300 | 0.00617100  |
| H | 1.61815300  | -0.62601700 | 2.17944600  |
| H | 1.56322900  | 1.91168500  | 1.33898600  |
| H | 1.56424800  | 1.90471500  | -1.34823500 |

## 2 at cam-B3LYP/def2-TZVP

|    |             |             |             |
|----|-------------|-------------|-------------|
| Mo | -0.53713600 | -0.17314400 | -0.00000600 |
| O  | -1.28014600 | -0.80767100 | -1.37563100 |
| O  | -1.28094300 | -0.80707400 | 1.37545000  |
| C  | -1.36468300 | 1.80673600  | -0.00050900 |
| C  | 1.63512100  | -0.27768800 | -1.14936600 |
| C  | 1.60872300  | -1.11161600 | 0.00284900  |
| C  | 1.63431800  | -0.27269400 | 1.15135100  |
| C  | 1.55789900  | 1.04418400  | 0.71267000  |
| C  | 1.55854900  | 1.04106400  | -0.71656400 |
| H  | -2.44515900 | 1.66677600  | -0.00147900 |
| H  | -1.07647700 | 2.36381400  | -0.88934900 |
| H  | -1.07804800 | 2.36343800  | 0.88907300  |
| H  | 1.61099900  | -0.61929200 | -2.17063800 |
| H  | 1.65256600  | -2.18912700 | 0.00522200  |
| H  | 1.60948200  | -0.60981100 | 2.17409800  |
| H  | 1.49724800  | 1.92008500  | 1.33725300  |
| H  | 1.49825900  | 1.91420100  | -1.34504900 |

## 2 at B3PW91/def2-TZVP

|    |             |             |             |
|----|-------------|-------------|-------------|
| Mo | -0.53342100 | -0.17232500 | -0.00138600 |
| O  | -1.24111300 | -0.83471200 | -1.39091000 |
| O  | -1.30326100 | -0.80928200 | 1.36564500  |
| C  | -1.38808300 | 1.79632300  | -0.03083100 |
| C  | 1.66732300  | -0.58072900 | -0.98229100 |
| C  | 1.61653800  | -1.05396700 | 0.36534100  |
| C  | 1.59015900  | 0.07295700  | 1.22527800  |
| C  | 1.52270500  | 1.21760000  | 0.41892400  |
| C  | 1.59185600  | 0.81219400  | -0.94755300 |
| H  | -2.46450800 | 1.63086600  | -0.11210400 |
| H  | -1.04694600 | 2.37777300  | -0.88749700 |
| H  | -1.17733600 | 2.33783400  | 0.89150600  |
| H  | 1.68377900  | -1.20019600 | -1.86552700 |
| H  | 1.64972600  | -2.08822900 | 0.67502700  |
| H  | 1.52368800  | 0.04158400  | 2.30182700  |
| H  | 1.44233300  | 2.23558800  | 0.76757200  |



|   |            |            |             |
|---|------------|------------|-------------|
| H | 1.54495900 | 1.46812700 | -1.80369200 |
|---|------------|------------|-------------|

## 2 at wB97xD/def2-TZVP

|    |             |             |             |
|----|-------------|-------------|-------------|
| Mo | -0.53303600 | -0.17537700 | -0.00124700 |
| O  | -1.23880000 | -0.83444400 | -1.38342300 |
| O  | -1.29774900 | -0.80068800 | 1.36452500  |
| C  | -1.36419800 | 1.80602000  | -0.03261400 |
| C  | 1.66031100  | -0.44542000 | -1.06299300 |
| C  | 1.60951000  | -1.08969400 | 0.20903100  |
| C  | 1.59512700  | -0.08173500 | 1.21039100  |
| C  | 1.51370600  | 1.15178500  | 0.56379000  |
| C  | 1.56669100  | 0.92570700  | -0.84657000 |
| H  | -2.44257500 | 1.66912700  | -0.12386800 |
| H  | -1.00423300 | 2.38767500  | -0.88030400 |
| H  | -1.15030100 | 2.33931500  | 0.89302600  |
| H  | 1.66503400  | -0.94421000 | -2.01829100 |
| H  | 1.65775100  | -2.15364800 | 0.38169400  |
| H  | 1.53763700  | -0.25324500 | 2.27282600  |
| H  | 1.42345700  | 2.11460200  | 1.03954600  |
| H  | 1.50625200  | 1.68728400  | -1.60725400 |

## 2 at MP2/def2-SVP

|    |             |             |             |
|----|-------------|-------------|-------------|
| Mo | -0.53462100 | -0.16981700 | 0.00001100  |
| O  | -1.35699100 | -0.79512500 | -1.38762100 |
| O  | -1.35400900 | -0.80303200 | 1.38587300  |
| C  | -1.34277000 | 1.84622200  | 0.00470900  |
| C  | 1.64868200  | -0.27983600 | -1.16654100 |
| C  | 1.61324800  | -1.14257100 | -0.02223700 |
| C  | 1.65271100  | -0.32009500 | 1.15189700  |
| C  | 1.59762300  | 1.02208800  | 0.73472200  |
| C  | 1.59406900  | 1.04709200  | -0.70219600 |
| H  | -2.43998800 | 1.75164700  | 0.01251600  |
| H  | -1.03879400 | 2.40124200  | -0.89560200 |
| H  | -1.02595400 | 2.40428600  | 0.89864400  |
| H  | 1.63935200  | -0.60327800 | -2.20734900 |
| H  | 1.66322900  | -2.23246700 | -0.04133800 |
| H  | 1.64806600  | -0.67992500 | 2.18072900  |
| H  | 1.56027800  | 1.89566300  | 1.38539700  |
| H  | 1.55449100  | 1.94301200  | -1.32158900 |

## 2 at MP2/def2-SVPD

|    |             |             |             |
|----|-------------|-------------|-------------|
| Mo | -0.52306800 | -0.17935300 | -0.00000300 |
| O  | -1.31461600 | -0.83686000 | -1.40047000 |
| O  | -1.31457100 | -0.83718500 | 1.40034300  |
| C  | -1.41431300 | 1.80769000  | 0.00017200  |
| C  | 1.67445900  | -0.86864300 | -0.72162700 |

|   |             |             |             |
|---|-------------|-------------|-------------|
| C | 1.67450600  | -0.86942000 | 0.72055300  |
| C | 1.59880300  | 0.47804700  | 1.15900200  |
| C | 1.50517400  | 1.30669000  | 0.00064900  |
| C | 1.59862400  | 0.47926400  | -1.15864000 |
| H | -2.50672200 | 1.67322300  | 0.00012400  |
| H | -1.11871500 | 2.37019400  | -0.89859300 |
| H | -1.11877300 | 2.37017500  | 0.89896600  |
| H | 1.73038600  | -1.74979200 | -1.35944900 |
| H | 1.73053800  | -1.75124200 | 1.35746600  |
| H | 1.53090300  | 0.80928300  | 2.19397000  |
| H | 1.40065200  | 2.38998900  | 0.00122000  |
| H | 1.53056300  | 0.81159800  | -2.19324400 |

## 2 at MP2/def2-TZVP

|    |             |             |             |
|----|-------------|-------------|-------------|
| Mo | 0.51904300  | -0.17736500 | 0.00036200  |
| O  | 1.29642900  | -0.85775800 | 1.39206300  |
| O  | 1.31728700  | -0.81165600 | -1.40100100 |
| C  | 1.40238600  | 1.80712100  | 0.02886500  |
| C  | -1.67032900 | -0.66133100 | 0.92844800  |
| C  | -1.65066200 | -1.01230300 | -0.45993000 |
| C  | -1.60051500 | 0.18763100  | -1.21513400 |
| C  | -1.50310300 | 1.26039400  | -0.30506900 |
| C  | -1.57445400 | 0.73641000  | 1.02024600  |
| H  | 2.48437300  | 1.66908800  | 0.10099600  |
| H  | 1.05499700  | 2.38271600  | 0.88928500  |
| H  | 1.17157100  | 2.35027700  | -0.88998500 |
| H  | -1.69866500 | -1.35746800 | 1.75451800  |
| H  | -1.70635600 | -2.01503100 | -0.86099800 |
| H  | -1.53687100 | 0.25344300  | -2.29200200 |
| H  | -1.39750500 | 2.30396600  | -0.56360600 |
| H  | -1.50102100 | 1.31011200  | 1.93354500  |

## Table 8

### MoO<sub>4</sub><sup>2-</sup> at MP2/def2-SVP

|    |             |             |             |
|----|-------------|-------------|-------------|
| Mo | 0.00000000  | 0.00000000  | 0.00000000  |
| O  | 1.04163200  | 1.04163200  | 1.04163200  |
| O  | -1.04163200 | -1.04163200 | 1.04163200  |
| O  | -1.04163200 | 1.04163200  | -1.04163200 |
| O  | 1.04163200  | -1.04163200 | -1.04163200 |

### MoO<sub>4</sub><sup>2-</sup> at MP2/def2-SVPD

|    |            |            |            |
|----|------------|------------|------------|
| Mo | 0.00000000 | 0.00000000 | 0.00000000 |
| O  | 1.04889600 | 1.04889600 | 1.04889600 |

|   |             |             |             |
|---|-------------|-------------|-------------|
| O | -1.04889600 | -1.04889600 | 1.04889600  |
| O | -1.04889600 | 1.04889600  | -1.04889600 |
| O | 1.04889600  | -1.04889600 | -1.04889600 |

### **MoO<sub>4</sub><sup>2-</sup> at MP2/def2-TZVP**

|    |             |             |             |
|----|-------------|-------------|-------------|
| Mo | 0.00000000  | 0.00000000  | 0.00000000  |
| O  | 1.04371700  | 1.04371700  | 1.04371700  |
| O  | -1.04371700 | -1.04371700 | 1.04371700  |
| O  | -1.04371700 | 1.04371700  | -1.04371700 |
| O  | 1.04371700  | -1.04371700 | -1.04371700 |

### **MoO<sub>4</sub><sup>2-</sup> at MP2/def2-TZVPD**

|    |             |             |             |
|----|-------------|-------------|-------------|
| Mo | 0.00000000  | 0.00000000  | 0.00000000  |
| O  | 1.04500000  | 1.04500000  | 1.04500000  |
| O  | -1.04500000 | -1.04500000 | 1.04500000  |
| O  | -1.04500000 | 1.04500000  | -1.04500000 |
| O  | 1.04500000  | -1.04500000 | -1.04500000 |

### **MoO<sub>4</sub><sup>2-</sup> at MP2/def2-QZVPD**

|    |             |             |             |
|----|-------------|-------------|-------------|
| Mo | 0.00000000  | 0.00000000  | 0.00000000  |
| O  | 1.04222100  | 1.04222100  | 1.04222100  |
| O  | -1.04222100 | -1.04222100 | 1.04222100  |
| O  | -1.04222100 | 1.04222100  | -1.04222100 |
| O  | 1.04222100  | -1.04222100 | -1.04222100 |

### **MoO<sub>4</sub><sup>2-</sup> at CCSD(T)/def2-SVP**

|    |             |             |             |
|----|-------------|-------------|-------------|
| Mo | -0.00000100 | 0.00000200  | 0.00000200  |
| O  | -0.44443100 | 1.69135700  | -0.36121200 |
| O  | 0.37592700  | -0.85471800 | -1.52210500 |
| O  | 1.43254300  | -0.02439100 | 1.06578800  |
| O  | -1.36403200 | -0.81225700 | 0.81751800  |

### **MoO<sub>4</sub><sup>2-</sup> at M06L/def2-SVP**

|    |             |             |             |
|----|-------------|-------------|-------------|
| Mo | 0.00000000  | 0.00000000  | 0.00000000  |
| O  | 1.02977800  | 1.02977800  | 1.02977800  |
| O  | -1.02977800 | -1.02977800 | 1.02977800  |
| O  | -1.02977800 | 1.02977800  | -1.02977800 |
| O  | 1.02977800  | -1.02977800 | -1.02977800 |

### MoO<sub>4</sub><sup>2-</sup> at M06L/def2-SVPD

|    |             |             |             |
|----|-------------|-------------|-------------|
| Mo | 0.00000000  | 0.00000000  | 0.00000000  |
| O  | 1.03190200  | 1.03190200  | 1.03190200  |
| O  | -1.03190200 | -1.03190200 | 1.03190200  |
| O  | -1.03190200 | 1.03190200  | -1.03190200 |
| O  | 1.03190200  | -1.03190200 | -1.03190200 |

### MoO<sub>4</sub><sup>2-</sup> at M06L/def2-TZVP

|    |             |             |             |
|----|-------------|-------------|-------------|
| Mo | 0.00000000  | 0.00000000  | 0.00000000  |
| O  | 1.03189400  | 1.03189400  | 1.03189400  |
| O  | -1.03189400 | -1.03189400 | 1.03189400  |
| O  | -1.03189400 | 1.03189400  | -1.03189400 |
| O  | 1.03189400  | -1.03189400 | -1.03189400 |

### MoO<sub>4</sub><sup>2-</sup> at M06L/def2-TZVPD

|    |             |             |             |
|----|-------------|-------------|-------------|
| Mo | 0.00000000  | 0.00000000  | 0.00000000  |
| O  | 1.03142500  | 1.03142500  | 1.03142500  |
| O  | -1.03142500 | -1.03142500 | 1.03142500  |
| O  | -1.03142500 | 1.03142500  | -1.03142500 |
| O  | 1.03142500  | -1.03142500 | -1.03142500 |

## Table 9

### 3 at M06L/def2-TZVP

|    |             |             |             |
|----|-------------|-------------|-------------|
| Mo | 0.28848700  | -0.42967000 | -0.00001200 |
| O  | 0.59933100  | -1.39928700 | 1.35649000  |
| O  | 0.59952000  | -1.39957000 | -1.35629800 |
| C  | -1.74743400 | 0.27263700  | 1.15118300  |
| C  | -2.04369700 | -0.51149500 | -0.00014000 |
| C  | -1.74740800 | 0.27285800  | -1.15131000 |
| C  | -1.19275800 | 1.47481100  | -0.71349400 |
| C  | -1.19278400 | 1.47467400  | 0.71366800  |
| H  | -1.83786900 | -0.05747700 | 2.17328700  |
| H  | -2.47205400 | -1.50218200 | -0.00023900 |
| H  | -1.83782100 | -0.05694300 | -2.17352900 |
| H  | -0.78047500 | 2.25174100  | -1.33770900 |
| H  | -0.78052400 | 2.25142600  | 1.33811000  |
| Cl | 1.97329300  | 1.15585300  | -0.00002400 |

### 4 at M06L/def2-TZVP

|    |             |             |             |
|----|-------------|-------------|-------------|
| Mo | 0.26005100  | -0.55862800 | -0.53665000 |
| O  | 0.71416700  | -2.42312900 | -0.41604600 |
| O  | -0.70047100 | -2.21086100 | -0.32960100 |
| O  | 0.08615400  | -0.12538000 | -2.15761100 |
| C  | -0.92383300 | -0.01089000 | 1.48831300  |
| C  | -1.74484400 | 0.28999100  | 0.34050300  |
| C  | -1.19583300 | 1.42946300  | -0.31372800 |
| C  | 0.03113600  | 1.71962400  | 0.30560900  |
| C  | 0.17489000  | 0.85479300  | 1.45896600  |
| Cl | 2.58961500  | -0.21940800 | -0.25423600 |
| C  | -1.21449600 | -1.07158200 | 2.48437400  |
| H  | -2.06216400 | -0.78788800 | 3.11174300  |
| H  | -1.46976700 | -2.01210900 | 1.99589600  |
| H  | -0.36571500 | -1.25349200 | 3.14001100  |
| C  | 1.25734800  | 0.95073000  | 2.46790800  |
| H  | 0.97762500  | 1.66872700  | 3.24289700  |
| H  | 1.44691900  | -0.00340300 | 2.95581300  |
| H  | 2.19163800  | 1.28741200  | 2.02555500  |
| C  | 0.97717800  | 2.79830100  | -0.07500100 |
| H  | 0.79141400  | 3.70168000  | 0.51089300  |
| H  | 2.00847100  | 2.49680100  | 0.10152500  |
| H  | 0.88488100  | 3.05858900  | -1.12781800 |
| C  | -1.73666500 | 2.09124000  | -1.52427400 |
| H  | -1.53490100 | 3.16100700  | -1.50626800 |
| H  | -1.27694500 | 1.68380000  | -2.42930900 |
| H  | -2.81290500 | 1.95490700  | -1.60765600 |
| C  | -3.02677400 | -0.38524600 | 0.01304600  |
| H  | -3.85022900 | 0.06228700  | 0.57459300  |
| H  | -3.26584800 | -0.30703200 | -1.04580400 |
| H  | -2.99550600 | -1.44254700 | 0.27101400  |

## 5 at M06L/def2-TZVP

|    |             |             |             |
|----|-------------|-------------|-------------|
| Mo | 1.63806800  | -0.45974200 | 0.06383300  |
| O  | 1.24082200  | -1.62785300 | -1.41576500 |
| O  | 2.64359800  | -1.37925500 | -1.29458600 |
| O  | 1.80510200  | -1.35497700 | 1.47944700  |
| C  | 2.78616400  | 1.46129300  | -0.93389800 |
| C  | 3.49138100  | 1.03556500  | 0.23603600  |
| C  | 2.68808900  | 1.31840800  | 1.35964800  |
| C  | 1.45065900  | 1.77729700  | 0.89140000  |
| C  | 1.53084100  | 1.90267900  | -0.53843300 |
| H  | 3.13333400  | 1.34153200  | -1.94753300 |
| H  | 4.48262700  | 0.60906300  | 0.25004500  |
| H  | 2.92809300  | 1.07922700  | 2.38243700  |
| H  | 0.58820600  | 2.02154900  | 1.48912100  |
| H  | 0.72459700  | 2.21815000  | -1.18032200 |
| C  | -0.43443700 | -0.22255100 | 0.04346300  |
| C  | -1.64923100 | -0.11424700 | 0.01670000  |
| C  | -3.06127600 | -0.00834900 | 0.00580700  |

|   |             |             |             |
|---|-------------|-------------|-------------|
| C | -3.69485700 | 1.07615800  | -0.61526300 |
| C | -3.85397300 | -0.99017800 | 0.61525700  |
| C | -5.07392800 | 1.17126600  | -0.62600500 |
| H | -3.08945700 | 1.83697300  | -1.09082300 |
| C | -5.23213900 | -0.88462600 | 0.60200700  |
| H | -3.37035800 | -1.83082000 | 1.09468200  |
| C | -5.84804600 | 0.19344900  | -0.01802500 |
| H | -5.54879600 | 2.01363400  | -1.11276700 |
| H | -5.83121900 | -1.65105000 | 1.07717300  |
| H | -6.92754100 | 0.27061400  | -0.02792100 |

## 6 at M06L/def2-TZVP

|   |             |             |             |
|---|-------------|-------------|-------------|
| O | -2.41091000 | -0.50907400 | 0.06028000  |
| O | -2.07003500 | 0.89278400  | -0.15754500 |
| O | -0.27326300 | -0.42774900 | -2.08873100 |
| C | 0.37829500  | 0.84829700  | 1.54722500  |
| C | 0.61531600  | 1.64533900  | 0.37894500  |
| C | 1.55305100  | 0.96067400  | -0.44650600 |
| C | 1.80784900  | -0.29427700 | 0.14792400  |
| C | 1.10648800  | -0.34863300 | 1.40410900  |
| C | -0.53279300 | 1.22912300  | 2.65868500  |
| H | -0.11645800 | 2.05413900  | 3.24038400  |
| H | -1.50228200 | 1.55543400  | 2.27927400  |
| H | -0.70571900 | 0.40002700  | 3.34160400  |
| C | 1.23875200  | -1.42657100 | 2.41657600  |
| H | 2.09693900  | -1.22665500 | 3.06193900  |
| H | 0.36095100  | -1.49735400 | 3.05611500  |
| H | 1.39748300  | -2.40192600 | 1.96166400  |
| C | 2.73383500  | -1.32632600 | -0.39079100 |
| H | 3.77420800  | -1.04449600 | -0.21356200 |
| H | 2.57856200  | -2.29611500 | 0.07741300  |
| H | 2.61156600  | -1.45174600 | -1.46639600 |
| C | 2.10830400  | 1.41803800  | -1.74525900 |
| H | 3.17999000  | 1.60700800  | -1.65972200 |
| H | 1.96415600  | 0.66620700  | -2.52130200 |
| H | 1.63706500  | 2.33661000  | -2.08734300 |
| C | 0.03278900  | 2.99391700  | 0.15078400  |
| H | 0.54150900  | 3.74065600  | 0.76394400  |
| H | 0.11873500  | 3.30536800  | -0.88803700 |
| H | -1.02318700 | 3.01630400  | 0.41961400  |
| C | -0.56600400 | -2.39049000 | 0.08193100  |
| H | 0.38558300  | -2.88908000 | -0.10496900 |
| H | -0.86962200 | -2.57433500 | 1.11134200  |
| H | -1.31832900 | -2.83176900 | -0.57098200 |
| W | -0.53963200 | -0.26987200 | -0.39911800 |

## 7 at M06L/def2-TZVP

|   |             |             |             |
|---|-------------|-------------|-------------|
| O | -1.21251100 | -0.73149500 | -1.39448900 |
| O | -1.21248600 | -0.73141200 | 1.39454300  |
| C | -1.11891700 | 1.92348100  | -0.00003300 |
| C | 1.74578200  | -0.32225200 | -1.15199900 |
| C | 1.66875400  | -1.15780200 | -0.00007800 |
| C | 1.74579900  | -0.32238300 | 1.15193900  |
| C | 1.76022400  | 1.00188700  | 0.71233800  |
| C | 1.76020700  | 1.00196800  | -0.71223700 |
| H | -2.20767200 | 1.87069800  | -0.00006700 |
| H | -0.80064700 | 2.47209100  | -0.88508600 |
| H | -0.80070100 | 2.47206400  | 0.88505700  |
| H | 1.69275000  | -0.65911300 | -2.17450000 |
| H | 1.64364600  | -2.23693000 | -0.00013600 |
| H | 1.69279500  | -0.65937200 | 2.17439900  |
| H | 1.74450600  | 1.87959900  | 1.33864500  |
| H | 1.74447800  | 1.87976000  | -1.33843400 |
| W | -0.41459800 | -0.10898600 | 0.00000100  |

### 8 at M06L/def2-TZVP

|    |             |             |             |
|----|-------------|-------------|-------------|
| W  | 0.23105800  | -0.39695500 | -0.21972900 |
| Si | -3.13826200 | 0.04680300  | 0.05963300  |
| O  | -0.38409500 | 0.04734400  | -1.76572800 |
| O  | -0.41437500 | -2.14218300 | 0.33882000  |
| O  | 0.85515900  | -2.22430500 | -0.37405300 |
| C  | -1.49640800 | 0.18635000  | 0.96997300  |
| C  | 1.14356600  | 1.77455500  | 0.27567300  |
| C  | 1.94037800  | 1.24841000  | -0.76696300 |
| C  | 2.55482600  | 0.06152900  | -0.28007800 |
| C  | 2.22640400  | -0.07607000 | 1.11060500  |
| C  | 1.35636100  | 0.97482600  | 1.45446300  |
| C  | 0.32362800  | 3.01224800  | 0.17687300  |
| C  | 2.00865600  | 1.79699600  | -2.14468700 |
| C  | 3.46537200  | -0.85427800 | -1.01634800 |
| C  | 2.70394200  | -1.17349200 | 1.99199800  |
| C  | 0.83814100  | 1.26638600  | 2.81595400  |
| C  | -4.51330400 | 0.14724900  | 1.33597300  |
| C  | -3.31552100 | -1.54991600 | -0.89129900 |
| C  | -3.29480900 | 1.51081000  | -1.09719400 |
| H  | -1.51206600 | -0.44641700 | 1.86051300  |
| H  | -1.43713600 | 1.22046900  | 1.31808800  |
| H  | -0.41256600 | 3.08104500  | 0.97542700  |
| H  | 0.95379000  | 3.90205500  | 0.24223500  |
| H  | -0.21181000 | 3.06284200  | -0.77117300 |
| H  | 2.67197000  | 1.21403700  | -2.77921800 |
| H  | 1.02218700  | 1.79933200  | -2.61248800 |
| H  | 2.37654300  | 2.82384000  | -2.13323600 |
| H  | 3.35483900  | -0.76417600 | -2.09479000 |
| H  | 4.50732100  | -0.63997600 | -0.76971000 |
| H  | 3.27686000  | -1.89350400 | -0.74739500 |
| H  | 2.56530500  | -2.14695800 | 1.52007300  |

|   |             |             |             |
|---|-------------|-------------|-------------|
| H | 3.76849900  | -1.06380900 | 2.20941200  |
| H | 2.17453100  | -1.18515500 | 2.94254800  |
| H | 1.60759400  | 1.76599300  | 3.40872800  |
| H | -0.02827600 | 1.92275800  | 2.79351400  |
| H | 0.55205600  | 0.36239100  | 3.35143300  |
| H | -4.47284200 | -0.68836900 | 2.03540000  |
| H | -4.45297700 | 1.06523400  | 1.92184800  |
| H | -5.49655400 | 0.12735300  | 0.86334800  |
| H | -4.30504100 | -1.61171400 | -1.34709000 |
| H | -2.57740500 | -1.62781400 | -1.68897800 |
| H | -3.19229400 | -2.42073900 | -0.24795900 |
| H | -4.24714000 | 1.49334100  | -1.62860000 |
| H | -3.24685000 | 2.45622500  | -0.55397100 |
| H | -2.50203500 | 1.51068400  | -1.84485100 |

### 9 at M06L/def2-TZVP

|    |             |             |             |
|----|-------------|-------------|-------------|
| Mo | -0.64368700 | -1.71719200 | 0.55528500  |
| O  | -0.12870700 | -1.97575100 | -1.29500700 |
| O  | -0.40801400 | -3.21538500 | -0.62585400 |
| O  | -1.95767300 | -1.38225200 | 1.94821500  |
| O  | -1.74113900 | -2.78087500 | 1.72363700  |
| O  | 0.81003800  | -1.51391000 | 1.38173300  |
| C  | -3.55532500 | -2.64221300 | -0.86847000 |
| C  | -3.38919800 | -0.37060500 | -0.53872800 |
| C  | -4.90512400 | -2.54516200 | -1.17069900 |
| H  | -3.03054500 | -3.59017600 | -0.85906100 |
| C  | -4.73612500 | -0.18730800 | -0.82383500 |
| C  | -5.50057100 | -1.29631700 | -1.14138400 |
| H  | -5.17487000 | 0.80103400  | -0.79875700 |
| H  | -6.55384200 | -1.18385100 | -1.36406200 |
| N  | -2.82238700 | -1.58053100 | -0.56388200 |
| H  | -5.47241500 | -3.43213600 | -1.41442600 |
| C  | -2.48822700 | 0.73440300  | -0.24779200 |
| C  | -2.77631900 | 2.09620700  | -0.16010000 |
| N  | -1.16601800 | 0.52251200  | -0.09683900 |
| C  | -1.56168200 | 2.69775000  | 0.03192000  |
| H  | -3.73207900 | 2.58430300  | -0.22308300 |
| N  | -0.60380000 | 1.74108500  | 0.06550200  |
| C  | -1.26842300 | 4.15541200  | 0.15716000  |
| F  | -0.48867500 | 4.60480000  | -0.83856100 |
| F  | -0.64258100 | 4.44737300  | 1.30528600  |
| F  | -2.40602100 | 4.84864900  | 0.12376000  |
| C  | 0.82619700  | 2.02927600  | -0.16462500 |
| H  | 0.90409300  | 2.38649900  | -1.19535800 |
| H  | 1.06770800  | 2.87379700  | 0.48113500  |
| C  | 1.77536900  | 0.88939300  | 0.06108400  |
| H  | 1.72779400  | 0.55682000  | 1.09642700  |
| H  | 1.47965900  | 0.03251000  | -0.54822000 |
| C  | 3.20020700  | 1.28047700  | -0.29206100 |



|   |             |             |             |
|---|-------------|-------------|-------------|
| H | 3.24770600  | 1.60415600  | -1.33745900 |
| H | 3.50602000  | 2.14997800  | 0.29976400  |
| C | 4.17697100  | 0.14031100  | -0.06635100 |
| H | 4.12749600  | -0.17485900 | 0.98057900  |
| H | 3.85058900  | -0.73169400 | -0.64179900 |
| C | 5.60874300  | 0.48660200  | -0.42936900 |
| H | 5.65414700  | 0.79431500  | -1.47983800 |
| H | 5.92865100  | 1.36429000  | 0.14302000  |
| C | 6.58559600  | -0.65065900 | -0.19487200 |
| H | 6.26372100  | -1.52949800 | -0.76337800 |
| H | 6.54226000  | -0.95652900 | 0.85582000  |
| C | 8.01925000  | -0.30993600 | -0.56179700 |
| H | 8.33636300  | 0.56954200  | 0.00677600  |
| H | 8.05850900  | -0.00585000 | -1.61213600 |
| C | 8.98531000  | -1.45175700 | -0.32157300 |
| H | 8.71141000  | -2.33159000 | -0.90510600 |
| H | 10.00678300 | -1.18604500 | -0.59058100 |
| H | 8.99070000  | -1.75168300 | 0.72709700  |

## 10 at M06L/def2-TZVP

|    |             |             |             |
|----|-------------|-------------|-------------|
| Mo | 0.00001000  | -1.27058900 | -0.04712900 |
| Cl | -0.00008700 | -1.24609400 | 2.28774500  |
| Cl | 0.00009800  | -0.15247600 | -2.16350400 |
| O  | -1.34305500 | -2.24883100 | -0.34200100 |
| O  | 1.34313300  | -2.24878200 | -0.34186300 |
| O  | -1.46452300 | 0.53923400  | 0.37638600  |
| C  | -2.52414600 | 0.61509300  | -0.24498200 |
| N  | -3.45898700 | 1.54179100  | -0.01522200 |
| H  | -2.78601900 | -0.08564700 | -1.04977700 |
| C  | -4.68160800 | 1.57560200  | -0.77985800 |
| H  | -5.54879900 | 1.44733800  | -0.12956900 |
| H  | -4.78413400 | 2.52853500  | -1.30203500 |
| H  | -4.67467300 | 0.77468600  | -1.51484200 |
| C  | -3.28165200 | 2.54216300  | 1.01323800  |
| H  | -4.08487200 | 2.47523800  | 1.74822600  |
| H  | -2.32847800 | 2.37485800  | 1.50458200  |
| H  | -3.29650700 | 3.54200300  | 0.57660000  |
| O  | 1.46447300  | 0.53929800  | 0.37651300  |
| C  | 2.52405100  | 0.61515400  | -0.24494600 |
| N  | 3.45895400  | 1.54178800  | -0.01518800 |
| H  | 2.78583300  | -0.08552800 | -1.04981900 |
| C  | 4.68151300  | 1.57560200  | -0.77992300 |
| H  | 5.54875300  | 1.44724900  | -0.12971600 |
| H  | 4.67448000  | 0.77474100  | -1.51496700 |
| H  | 4.78403900  | 2.52856900  | -1.30203700 |
| C  | 3.28175800  | 2.54208500  | 1.01337000  |
| H  | 3.29661200  | 3.54196000  | 0.57681200  |
| H  | 2.32862400  | 2.37478000  | 1.50479200  |
| H  | 4.08504500  | 2.47506700  | 1.74827500  |

**Table 12****1-CF<sub>3</sub> PCM acetonitrile M06L/def2-TZVP**

|    |             |             |             |
|----|-------------|-------------|-------------|
| Mo | 0.29848900  | 0.44683600  | -0.25153700 |
| F  | -2.06447000 | -0.59760200 | 1.39185900  |
| F  | -1.93101600 | -1.59891300 | -0.52171300 |
| F  | -2.66499200 | 0.42367300  | -0.40755100 |
| O  | -0.57857900 | 1.82076700  | 0.78912600  |
| O  | 0.78936400  | 2.14486100  | 0.52599000  |
| O  | -0.01313300 | 0.62006700  | -1.90505200 |
| C  | 2.21624300  | -0.92278300 | -0.73027400 |
| C  | 1.11614200  | -1.76731900 | -0.53874500 |
| C  | 0.70263900  | -1.64572800 | 0.82383400  |
| C  | 1.55516900  | -0.72815600 | 1.46246100  |
| C  | 2.46202200  | -0.24569200 | 0.49432200  |
| C  | -1.73616300 | -0.41220200 | 0.09774300  |
| H  | 2.73223100  | -0.74787900 | -1.66073600 |
| H  | 0.64028300  | -2.38042500 | -1.28716000 |
| H  | -0.11474200 | -2.17879100 | 1.28075400  |
| H  | 1.46496700  | -0.37612500 | 2.47794500  |
| H  | 3.20750000  | 0.51741400  | 0.65381600  |

**1-CF<sub>3</sub> three acetonitrile M06L/def2-TZVP**

|    |             |             |             |
|----|-------------|-------------|-------------|
| Mo | -0.00913100 | 0.08243100  | 0.05609700  |
| F  | -2.37764900 | -1.65411400 | -0.77837200 |
| F  | -0.50325500 | -2.68081600 | -1.11198500 |
| F  | -1.12078800 | -1.09238900 | -2.43401400 |
| O  | -1.40394600 | 1.10632000  | -0.81044500 |
| O  | -0.68512700 | 1.88595600  | 0.15249000  |
| O  | 1.36835500  | 0.05280800  | -0.92712700 |
| C  | 1.39515100  | -0.56075700 | 1.90197700  |
| C  | 0.73082500  | -1.70384400 | 1.44716700  |
| C  | -0.67000300 | -1.52085900 | 1.69078000  |
| C  | -0.85538400 | -0.26749200 | 2.29118400  |
| C  | 0.41623300  | 0.35458000  | 2.36868600  |
| C  | -1.09014400 | -1.46741400 | -1.14296700 |
| H  | 2.45084700  | -0.36166200 | 1.81147000  |
| H  | 1.19764200  | -2.54929200 | 0.96621300  |
| H  | -1.44898000 | -2.22694300 | 1.45100900  |
| H  | -1.81079600 | 0.18530700  | 2.51277000  |
| H  | 0.61114100  | 1.35887500  | 2.71317300  |
| H  | 0.75987900  | 4.07333900  | -1.04681500 |
| H  | -4.04433800 | 2.04409300  | -1.10574800 |
| H  | 4.02086300  | -0.11957300 | -1.92304000 |
| C  | 4.43035200  | -0.24019000 | -0.92209800 |
| H  | 5.51744100  | -0.24176500 | -0.97890700 |
| H  | 4.10542300  | 0.60763300  | -0.31912000 |
| C  | 3.95252400  | -1.46786600 | -0.33740400 |
| N  | 3.57149500  | -2.44416700 | 0.14584700  |

|   |             |            |             |
|---|-------------|------------|-------------|
| C | 1.60629000  | 3.43084500 | -1.27954800 |
| H | 1.24955300  | 2.61100300 | -1.90253500 |
| H | 2.34726900  | 4.00391700 | -1.83438500 |
| C | 2.17871800  | 2.90232000 | -0.06726900 |
| N | 2.63636800  | 2.46130200 | 0.89685700  |
| C | -4.46863800 | 1.06756600 | -0.88181100 |
| H | -5.54654800 | 1.10476300 | -1.02997200 |
| H | -4.03864500 | 0.34681000 | -1.57466200 |
| C | -4.15942000 | 0.69350100 | 0.47510700  |
| N | -3.92290900 | 0.39204000 | 1.56324600  |

**1-CF<sub>3</sub> PCM water M06L/def2-TZVP (Tight convergence criteria and ultrafine integration grid)**

|    |             |             |             |
|----|-------------|-------------|-------------|
| Mo | 0.29650400  | 0.44800200  | -0.25313700 |
| F  | -2.05393800 | -0.61745100 | 1.39138100  |
| F  | -1.93151500 | -1.59540100 | -0.53529800 |
| F  | -2.66683600 | 0.42535800  | -0.39100700 |
| O  | -0.58597500 | 1.81173500  | 0.79339500  |
| O  | 0.77830500  | 2.14776000  | 0.52708100  |
| O  | -0.01926800 | 0.62179600  | -1.90554200 |
| C  | 2.23798600  | -0.89650000 | -0.71659300 |
| C  | 1.14538100  | -1.75737300 | -0.55730800 |
| C  | 0.70437200  | -1.65798100 | 0.79732200  |
| C  | 1.53544700  | -0.74040700 | 1.46602000  |
| C  | 2.45608600  | -0.23608500 | 0.52314300  |
| C  | -1.73373200 | -0.41647200 | 0.09735500  |
| H  | 2.77020700  | -0.70356300 | -1.63399400 |
| H  | 0.69150000  | -2.36557900 | -1.32280800 |
| H  | -0.11370800 | -2.20784500 | 1.23211600  |
| H  | 1.42175000  | -0.40582800 | 2.48482100  |
| H  | 3.18995000  | 0.53274500  | 0.70684500  |

**1-CF<sub>3</sub> three water M06L/def2-TZVP (Tight convergence criteria and ultrafine integration grid)**

|    |             |             |             |
|----|-------------|-------------|-------------|
| Mo | 0.03634400  | 0.09611800  | -0.11005300 |
| F  | 2.99867100  | 0.83497900  | -0.31895800 |
| F  | 2.59347800  | -0.37476400 | 1.43013700  |
| F  | 2.00980900  | 1.70034400  | 1.38555900  |
| O  | 0.45128200  | 1.80494100  | -0.89866100 |
| O  | -0.84992600 | 1.36348200  | -1.28453200 |
| O  | -0.51577000 | 0.18685400  | 1.49307200  |
| C  | -0.64435100 | -2.18662800 | -0.42661200 |
| C  | 0.67632000  | -2.18992000 | 0.04171600  |
| C  | 1.50034900  | -1.60454100 | -0.96686100 |
| C  | 0.67952700  | -1.24967300 | -2.05176600 |
| C  | -0.64871200 | -1.56833700 | -1.70487300 |
| C  | 2.08107500  | 0.59566900  | 0.63630100  |
| H  | -1.51551300 | -2.50025300 | 0.12598900  |
| H  | 1.01549400  | -2.53642700 | 1.00473900  |

|   |             |             |             |
|---|-------------|-------------|-------------|
| H | 2.56591700  | -1.46323900 | -0.90188800 |
| H | 0.99497900  | -0.71852000 | -2.93581500 |
| H | -1.53467200 | -1.33458500 | -2.27229100 |
| H | -3.23409900 | 0.59546600  | -0.19578500 |
| H | -2.29988600 | 2.40536000  | -0.51425400 |
| O | -2.89775800 | -0.31445900 | -0.27627200 |
| H | -3.06348000 | -0.72207900 | 0.58905200  |
| O | -3.17872800 | 2.46533800  | -0.10610400 |
| H | -3.67966200 | 3.05220100  | -0.67715600 |
| H | -1.81831500 | -0.93050800 | 2.33745000  |
| O | -2.53648100 | -1.57628200 | 2.24177800  |
| H | -3.02101100 | -1.54778800 | 3.06988900  |

## checkCIF results

### CpMo( $\eta^2$ -O<sub>2</sub>)OCH<sub>3</sub>

Reference: A. M. Al-Ajlouni, D. Veljanovski, A. Capapé, J. Zhao, E. Herdtweck, M. J. Calhorda and F. E. Kühn, *Organometallics*, 2009, **28**, 639.

## Datablock: ZHAP-1041-173

---

Bond precision: C-C = 0.0114 Å

Wavelength=0.71073

Cell: a=6.5225 (5)

b=7.9532 (5)

c=13.9632 (7)

alpha=90

beta=90

gamma=90

Temperature: 173 K

|                        | Calculated   | Reported    |
|------------------------|--------------|-------------|
| Volume                 | 724.34 (8)   | 724.34 (8)  |
| Space group            | P 21 21 21   | P 21 21 21  |
| Hall group             | P 2ac 2ab    | P 2ac 2ab   |
| Moiety formula         | C6 H8 Mo O3  | C6 H8 Mo O3 |
| Sum formula            | C6 H8 Mo O3  | C6 H8 Mo O3 |
| Mr                     | 224.06       | 224.06      |
| Dx, g cm <sup>-3</sup> | 2.055        | 2.055       |
| Z                      | 4            | 4           |
| Mu (mm <sup>-1</sup> ) | 1.751        | 1.751       |
| F000                   | 440.0        | 440.0       |
| F000'                  | 433.28       |             |
| h,k,lmax               | 8,10,18      | 8,10,18     |
| Nref                   | 1716 [ 1022] | 1711        |
| Tmin,Tmax              | 0.692,0.839  | 0.677,0.839 |
| Tmin'                  | 0.442        |             |

Correction method= # Reported T Limits: Tmin=0.677 Tmax=0.839

AbsCorr = NUMERICAL

Data completeness= 1.67/1.00

Theta(max)= 27.810

R(reflections)= 0.0384 ( 1662)

wR2(reflections)= 0.0989 ( 1711)

S = 1.094

Npar= 94

---

---

● **Alert level C**

STRVA01\_ALERT\_4\_C                      Flack test results are ambiguous.  
                    From the CIF: `_refine_ls_abs_structure_Flack`      0.510  
                    From the CIF: `_refine_ls_abs_structure_Flack_su`      0.150  
PLAT234\_ALERT\_4\_C Large Hirshfeld Difference O1      --      O2      ..      0.19 Ang.  
PLAT234\_ALERT\_4\_C Large Hirshfeld Difference C13      --      C14      ..      0.16 Ang.  
PLAT241\_ALERT\_2\_C High                  Ueq as Compared to Neighbors for .....      O1 Check  
PLAT241\_ALERT\_2\_C High                  Ueq as Compared to Neighbors for .....      O2 Check  
PLAT241\_ALERT\_2\_C High                  Ueq as Compared to Neighbors for .....      C14 Check  
PLAT242\_ALERT\_2\_C Low                  Ueq as Compared to Neighbors for .....      Mo Check  
PLAT342\_ALERT\_3\_C Low Bond Precision on    C-C Bonds .....      0.0114 Ang.

---

● **Alert level G**

PLAT005\_ALERT\_5\_G No `_iucr_refine_instructions_details` in the CIF      Please Do !  
PLAT033\_ALERT\_4\_G Flack x Value Deviates > 2\*sigma from Zero .....      0.510 Note

- 
- 0 **ALERT level A** = Most likely a serious problem - resolve or explain  
0 **ALERT level B** = A potentially serious problem, consider carefully  
8 **ALERT level C** = Check. Ensure it is not caused by an omission or oversight  
2 **ALERT level G** = General information/check it is not something unexpected
- 0 ALERT type 1 CIF construction/syntax error, inconsistent or missing data  
4 ALERT type 2 Indicator that the structure model may be wrong or deficient  
1 ALERT type 3 Indicator that the structure quality may be low  
4 ALERT type 4 Improvement, methodology, query or suggestion  
1 ALERT type 5 Informative message, check
-

## CpMo( $\eta^2$ -O<sub>2</sub>)OCl

Reference: M. V. Galakhov, P. Gómez-Sal, T. Pedraz, M. A. Pellinghelli, P. Royo, A. Tiripicchio and A. Vázquez de Miguel, *Journal of Organometallic Chemistry*, 1999, **579**, 190.

### Datablock: 6

---

|                 |                |                    |
|-----------------|----------------|--------------------|
| Bond precision: | C-C = 0.0135 Å | Wavelength=0.71073 |
|-----------------|----------------|--------------------|

  

|              |            |                |            |
|--------------|------------|----------------|------------|
| Cell:        | a=6.611(2) | b=9.472(3)     | c=6.579(3) |
|              | alpha=90   | beta=118.96(2) | gamma=90   |
| Temperature: | 293 K      |                |            |

  

|                        | Calculated     | Reported         |
|------------------------|----------------|------------------|
| Volume                 | 360.5(2)       | 360.5(2)         |
| Space group            | P 21/m         | P 21/m           |
| Hall group             | -P 2yb         | ?                |
| Moiety formula         | C9 H9 Cl Mo O6 | ?                |
| Sum formula            | C9 H9 Cl Mo O6 | C5 H5 Cl1 O3 Mo1 |
| Mr                     | 344.55         | 244.49           |
| Dx, g cm <sup>-3</sup> | 1.587          | 2.253            |
| Z                      | 1              | 2                |
| Mu (mm <sup>-1</sup> ) | 1.105          | 2.128            |
| F000                   | 170.0          | 236.0            |
| F000'                  | 168.51         |                  |
| h,k,lmax               | 8,12,8         |                  |
| Nref                   | 837            |                  |
| Tmin,Tmax              | 0.591,0.682    | 0.587,1.000      |
| Tmin'                  | 0.569          |                  |

  

Correction method= # Reported T Limits: Tmin=0.587 Tmax=1.000  
AbsCorr = EMPIRICAL

  

|                          |             |
|--------------------------|-------------|
| Data completeness= 0.000 | Theta(max)= |
|--------------------------|-------------|

  

|                              |                                    |
|------------------------------|------------------------------------|
| R(reflections)= 0.0460( 738) | wR2(reflections)= wR= 0.0569( 738) |
|------------------------------|------------------------------------|

  

|           |          |
|-----------|----------|
| S = 1.150 | Npar= 75 |
|-----------|----------|

---

---

### Alert level A

CHEMW03\_ALERT\_2\_A ALERT: The ratio of given/expected molecular weight as calculated from the \_atom\_site\* data lies outside the range 0.90 <> 1.10  
From the CIF: \_cell\_formula\_units\_Z 2  
From the CIF: \_chemical\_formula\_weight 244.49  
TEST: Calculate formula weight from \_atom\_site\*  
atom mass num sum  
Mo 95.94 0.50 47.97  
Cl 35.45 0.50 17.73  
O 16.00 3.00 48.00  
C 12.01 4.50 54.05  
H 1.01 4.50 4.54  
Calculated formula weight 172.28  
RADNT01\_ALERT\_1\_A The radiation type should contain one of the following  
\* 'Cu K\alpha'  
\* 'Mo K\alpha'  
\* 'Ag K\alpha'  
\* 'Ga K\alpha'  
\* neutron  
\* synchrotron  
SHFSU01\_ALERT\_2\_A The absolute value of parameter shift to su ratio > 0.20  
Absolute value of the parameter shift to su ratio given 0.400  
Additional refinement cycles may be required.  
WEIGH01\_ALERT\_1\_A The weighting scheme should be one of the following  
\* sigma  
\* calc  
Weighting scheme given as 0.6181(\s^2(Po)+0.0016Po^2)^-1^  
PLAT026\_ALERT\_3\_A Ratio Observed / Unique Reflections too Low .... 0 %  
PLAT027\_ALERT\_3\_A diffrn\_reflns\_theta\_full (too) Low ..... 0.00 Degree  
PLAT029\_ALERT\_3\_A diffrn\_measured\_fraction\_theta\_full Low ..... 0.000 Note  
PLAT043\_ALERT\_1\_A Calculated and Reported Mol. Weight Differ by .. 144.43 Check  
PLAT051\_ALERT\_1\_A Mu(calc) and Mu(CIF) Ratio Differs from 1.0 by . 48.10 %  
PLAT080\_ALERT\_2\_A Maximum Shift/Error ..... 0.40

---

### Alert level B

CHEMS01\_ALERT\_1\_B The sum formula contains elements in the wrong order.  
O precedes Mo  
Sequence must be C, H, then alphabetical.

---

### Alert level C

ABSTY02\_ALERT\_1\_C An \_exptl\_absorpt\_correction type has been given without a literature citation. This should be contained in the \_exptl\_absorpt\_process\_details field.  
Absorption correction given as empirical  
HYDTR01\_ALERT\_1\_C The hydrogen treatment should only be one of the following keywords  
\* refall  
\* refxyz  
\* refU  
\* noref  
\* undef  
\* constr  
\* none  
\* mixed  
Hydrogen treatment given as refined isotropically  
PLAT041\_ALERT\_1\_C Calc. and Reported SumFormula Strings Differ Please Check  
PLAT068\_ALERT\_1\_C Reported F000 Differs from Calcd (or Missing)... Please Check  
PLAT076\_ALERT\_1\_C Occupancy 0.500 less than 1.0 for Sp.pos . MO



# ● Alert level G

FORMU01\_ALERT\_2\_G There is a discrepancy between the atom counts in the  
     \_chemical\_formula\_sum and the formula from the \_atom\_site\* data.  
     Atom count from \_chemical\_formula\_sum: C5 H5 Cl1 Mo1 O3  
     Atom count from the \_atom\_site data: C4.5 H4.5 Cl0.5 Mo0.5 O3

ABSMU01\_ALERT\_1\_G Calculation of \_exptl\_absorpt\_correction\_mu  
     not performed for this radiation type.

CELLZ01\_ALERT\_1\_G Difference between formula and atom\_site contents detected.

CELLZ01\_ALERT\_1\_G ALERT: Large difference may be due to a  
     symmetry error - see SYMMG tests  
     From the CIF: \_cell\_formula\_units\_Z 2  
     From the CIF: \_chemical\_formula\_sum C5 H5 Cl1 O3 Mo1  
     TEST: Compare cell contents of formula and atom\_site data

| atom | Z*formula | cif sites | diff |
|------|-----------|-----------|------|
| Mo   | 2.00      | 1.00      | 1.00 |
| Cl   | 2.00      | 1.00      | 1.00 |
| O    | 6.00      | 6.00      | 0.00 |
| C    | 10.00     | 9.00      | 1.00 |
| H    | 10.00     | 9.00      | 1.00 |

|                                                                    |              |
|--------------------------------------------------------------------|--------------|
| PLAT005_ALERT_5_G No _iucr_refine_instructions details in the CIF  | Please Do !  |
| PLAT045_ALERT_1_G Calculated and Reported Z Differ by .....        | 0.50 Ratio   |
| PLAT164_ALERT_4_G Nr. of Refined C-H H-Atoms in Heavy-Atom Struct. | 2 Note       |
| PLAT199_ALERT_1_G Reported _cell_measurement_temperature ..... (K) | 293 Check    |
| PLAT200_ALERT_1_G Reported _diffrn_ambient_temperature ..... (K)   | 293 Check    |
| PLAT300_ALERT_4_G Atom Site Occupancy of *Mo is Constrained at     | 0.500 Check  |
| PLAT300_ALERT_4_G Atom Site Occupancy of *Cl is Constrained at     | 0.500 Check  |
| PLAT300_ALERT_4_G Atom Site Occupancy of *O1 is Constrained at     | 0.500 Check  |
| PLAT300_ALERT_4_G Atom Site Occupancy of *O2 is Constrained at     | 0.500 Check  |
| PLAT300_ALERT_4_G Atom Site Occupancy of *O3 is Constrained at     | 0.500 Check  |
| PLAT300_ALERT_4_G Atom Site Occupancy of *C1 is Constrained at     | 0.500 Check  |
| PLAT300_ALERT_4_G Atom Site Occupancy of *H1 is Constrained at     | 0.500 Check  |
| PLAT300_ALERT_4_G Atom Site Occupancy of *O1_a is Constrained at   | 0.500 Check  |
| PLAT300_ALERT_4_G Atom Site Occupancy of *O2_a is Constrained at   | 0.500 Check  |
| PLAT300_ALERT_4_G Atom Site Occupancy of *O3_a is Constrained at   | 0.500 Check  |
| PLAT301_ALERT_3_G Main Residue Disorder ..... Percentage =         | 53 Note      |
| PLAT808_ALERT_5_G No Parseable SHELXL Style Weighting Scheme Found | Please Check |
| PLAT811_ALERT_5_G No ADDSYM Analysis: Too Many Excluded Atoms .... | ! Info       |

## CpMo( $\eta^2$ -O<sub>2</sub>)OCF<sub>3</sub>

Reference: S. A. Hauser, R. M. Reich, J. Mink, A. Pothig, M. Cokoja and F. E. Kuhn, *Catalysis Science & Technology*, 2015. DOI: 10.1039/C4CY01604A

---

### Datablock: Compound6

---

Bond precision: C-C = 0.0042 Å                      Wavelength=0.71073

Cell:                      a=20.5911(3)                      b=6.9325(1)                      c=12.3919(2)  
                                 alpha=90                      beta=117.372(1)                      gamma=90

Temperature:                      123 K

|                        | Calculated     | Reported       |
|------------------------|----------------|----------------|
| Volume                 | 1570.87(4)     | 1570.87(4)     |
| Space group            | C 2/c          | C 2/c          |
| Hall group             | -C 2yc         | -C 2yc         |
| Moiety formula         | C6 H5 F3 Mo O3 | C6 H5 F3 Mo O3 |
| Sum formula            | C6 H5 F3 Mo O3 | C6 H5 F3 Mo O3 |
| Mr                     | 278.04         | 278.04         |
| Dx, g cm <sup>-3</sup> | 2.351          | 2.351          |
| Z                      | 8              | 8              |
| Mu (mm <sup>-1</sup> ) | 1.693          | 1.693          |
| F000                   | 1072.0         | 1072.0         |
| F000'                  | 1058.95        |                |
| h,k,lmax               | 24,8,14        | 24,8,14        |
| Nref                   | 1446           | 1447           |
| Tmin,Tmax              | 0.833,0.873    | 0.594,0.881    |
| Tmin'                  | 0.562          |                |

Correction method= # Reported T Limits: Tmin=0.594 Tmax=0.881  
AbsCorr = MULTI-SCAN

Data completeness= 1.001                      Theta(max)= 25.400

R(reflections)= 0.0194( 1266)                      wR2(reflections)= 0.0448( 1447)

S = 1.043                      Npar= 118

---

## Datablock: Compound3

---

Bond precision: C-C = 0.0080 Å

Wavelength=0.71073

Cell: a=6.4530(2) b=6.5440(2) c=6.7851(2)  
alpha=107.752(1) beta=97.132(1) gamma=107.192(1)  
Temperature: 123 K

|                        | Calculated     | Reported       |
|------------------------|----------------|----------------|
| Volume                 | 253.356(14)    | 253.356(14)    |
| Space group            | P 1            | P 1            |
| Hall group             | P 1            | P 1            |
| Moiety formula         | C9 H5 F3 Mo O3 | C9 H5 F3 Mo O3 |
| Sum formula            | C9 H5 F3 Mo O3 | C9 H5 F3 Mo O3 |
| Mr                     | 314.07         | 314.07         |
| Dx, g cm <sup>-3</sup> | 2.059          | 2.059          |
| Z                      | 1              | 1              |
| Mu (mm <sup>-1</sup> ) | 1.326          | 1.326          |
| F000                   | 152.0          | 152.0          |
| F000'                  | 150.38         |                |
| h,k,lmax               | 7,7,8          | 7,7,8          |
| Nref                   | 1858[ 929]     | 910            |
| Tmin,Tmax              | 0.839,0.911    | 0.529,0.913    |
| Tmin'                  | 0.482          |                |

Correction method= # Reported T Limits: Tmin=0.529 Tmax=0.913  
AbsCorr = MULTI-SCAN

Data completeness= 0.98/0.49 Theta(max)= 25.370

R(reflections)= 0.0147( 905) wR2(reflections)= 0.0381( 910)

S = 1.111 Npar= 145

---

The following ALERTS were generated. Each ALERT has the format  
**test-name\_ALERT\_alert-type\_alert-level.**  
Click on the hyperlinks for more details of the test.

---

### Alert level G

|                   |                                         |              |             |
|-------------------|-----------------------------------------|--------------|-------------|
| PLAT005_ALERT_5_G | No _iucr_refine_instructions_details    | in the CIF   | Please Do ! |
| PLAT128_ALERT_4_G | Alternate Setting for Input Space Group | C2/c         | I2/a Note   |
| PLAT232_ALERT_2_G | Hirshfeld Test Diff (M-X)               | Mo1 -- O1 .. | 5.6 su      |
| PLAT232_ALERT_2_G | Hirshfeld Test Diff (M-X)               | Mo1 -- O2 .. | 6.2 su      |

---
